# Supplementary material for: Single cell transcriptomic profiling of large intestinal enteroendocrine cells in mice – Identification of selective stimuli for insulin-like peptide-5 and glucagon-like peptide-1 co-expressing cells
Source: PubMed Central journal article supplement (PMC6812004; doi:10.1016/j.molmet.2019.09.001), 2019-09-07

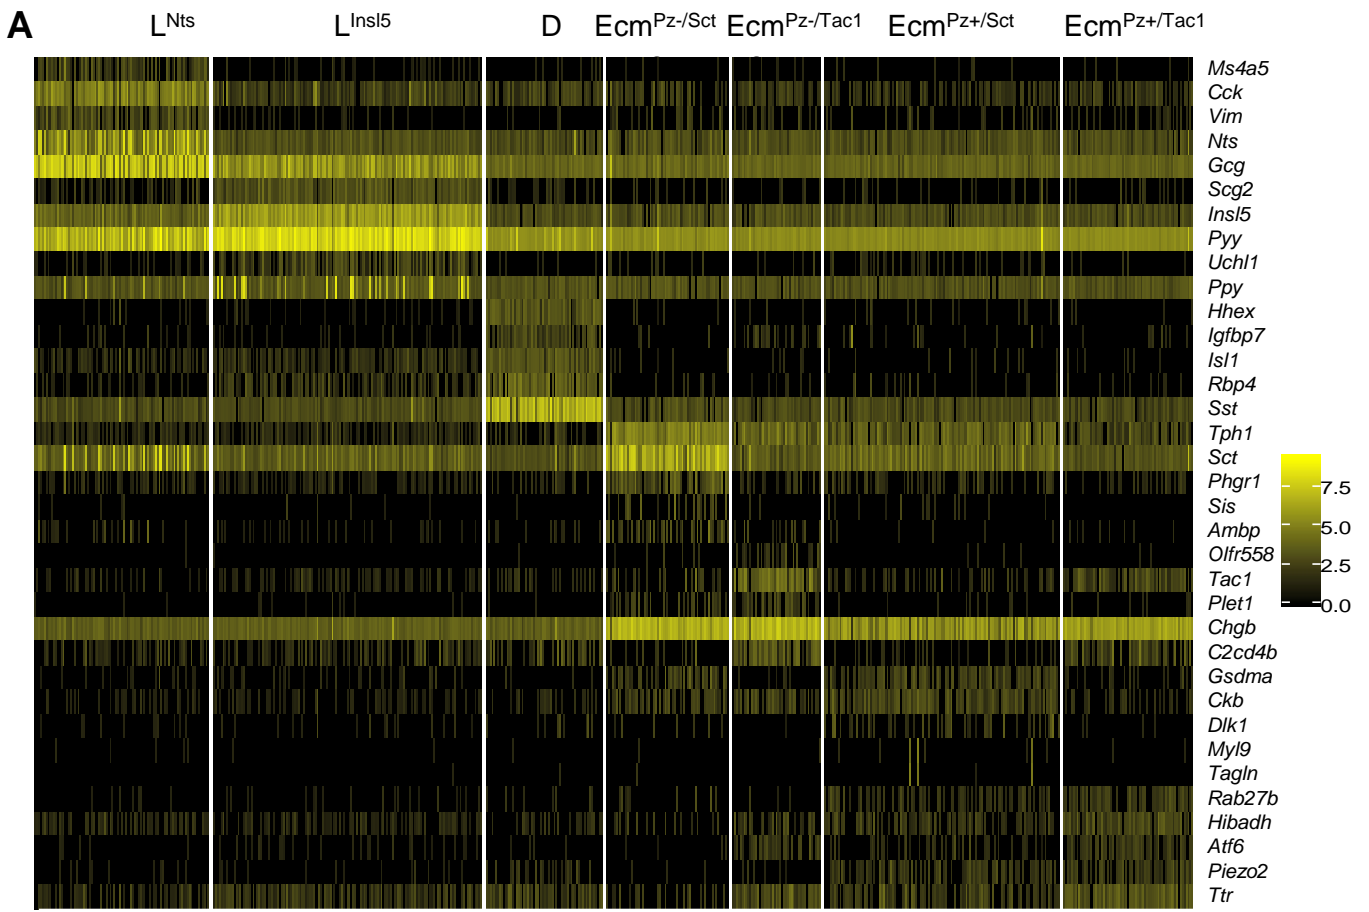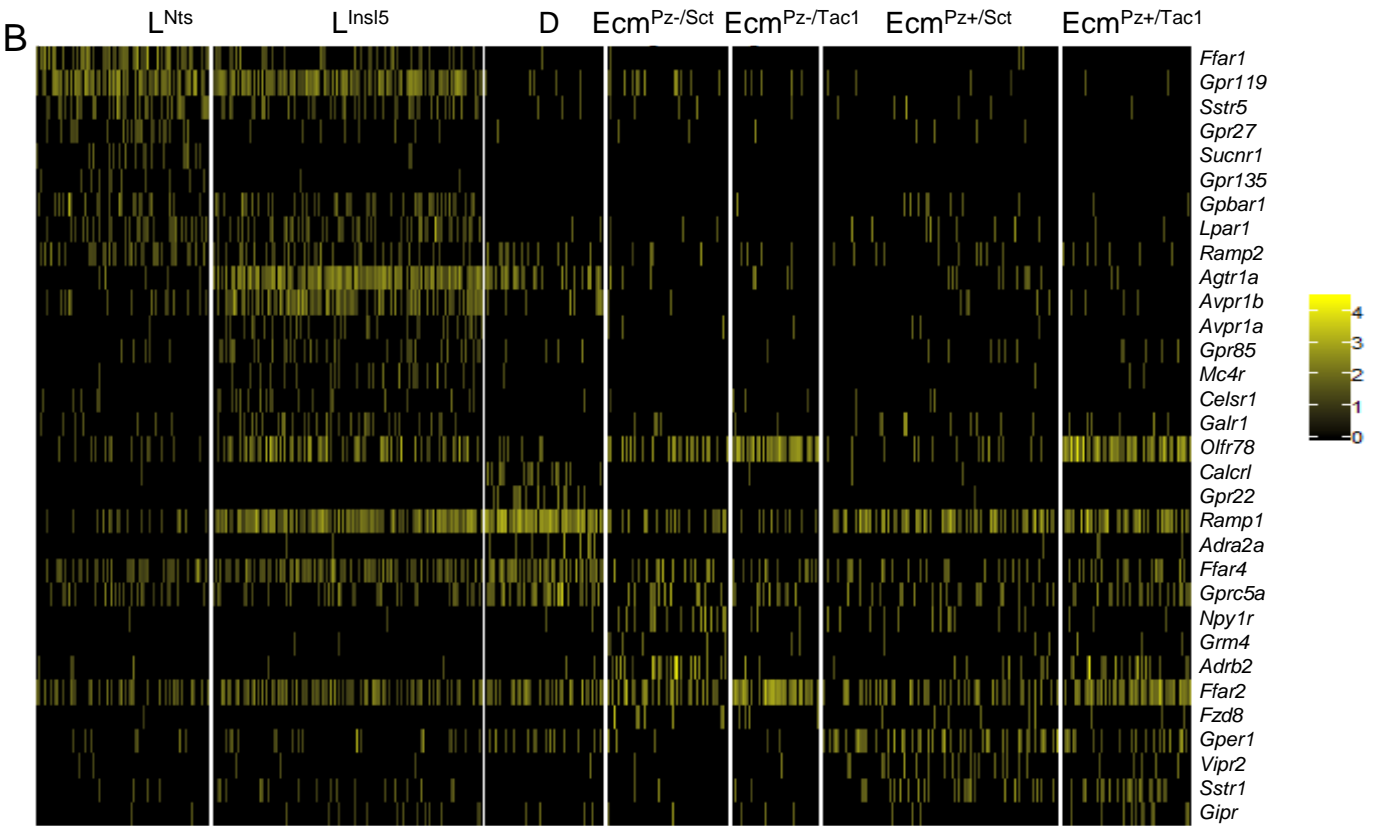

**C**L<sup>Nts</sup>L<sup>Insl5</sup>**D**Ecm<sup>Pz-/Sct</sup>Ecm<sup>Pz-/Tac1</sup>Ecm<sup>Pz+/Sct</sup>Ecm<sup>Pz+/Tac1</sup>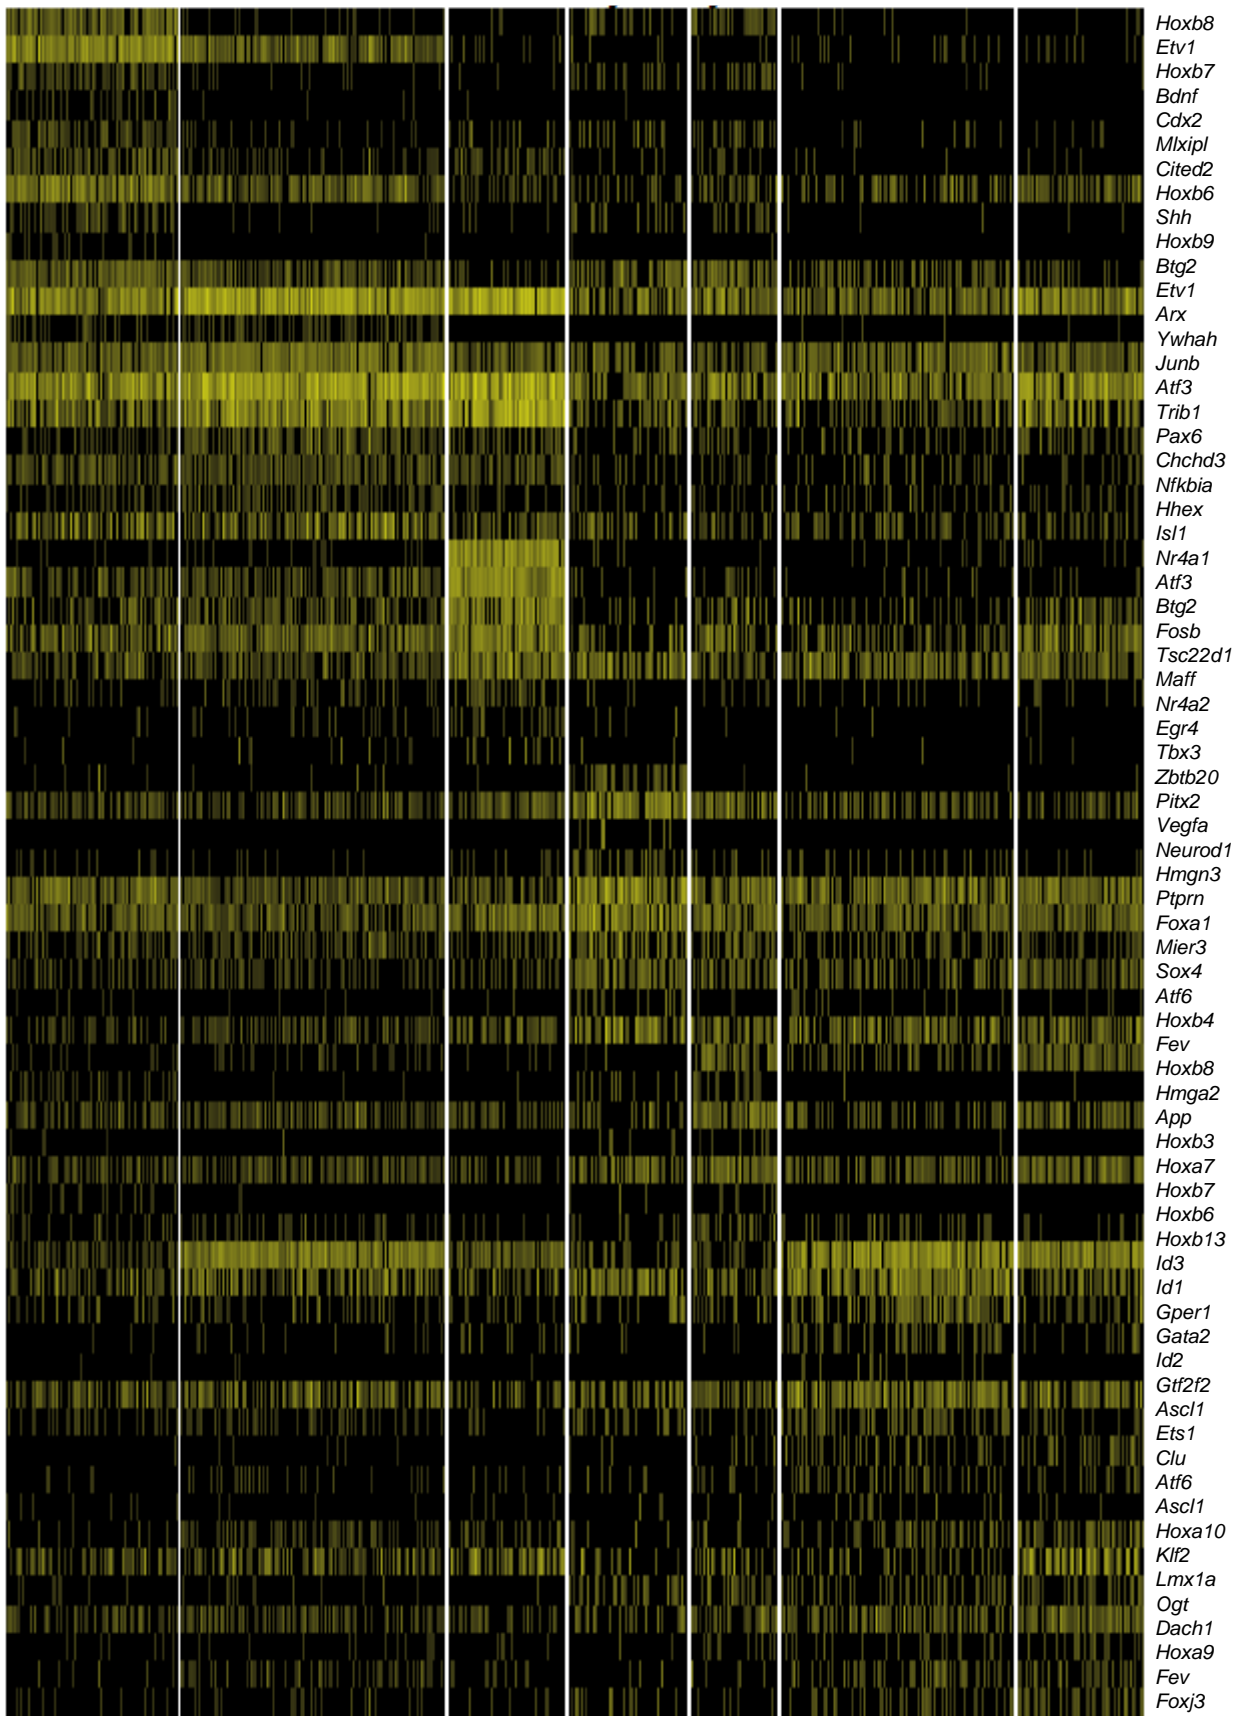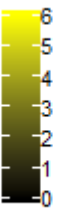

*Hoxb8*  
*Etv1*  
*Hoxb7*  
*Bdnf*  
*Cdx2*  
*Mxipl*  
*Cited2*  
*Hoxb6*  
*Shh*  
*Hoxb9*  
*Btg2*  
*Etv1*  
*Arx*  
*Ywhah*  
*Junb*  
*Atf3*  
*Trib1*  
*Pax6*  
*Chchd3*  
*Nfkbia*  
*Hhex*  
*Isl1*  
*Nr4a1*  
*Atf3*  
*Btg2*  
*Fosb*  
*Tsc22d1*  
*Maff*  
*Nr4a2*  
*Egr4*  
*Tbx3*  
*Zbtb20*  
*Pitx2*  
*Vegfa*  
*Neurod1*  
*Hmgn3*  
*Ptprn*  
*Foxa1*  
*Mier3*  
*Sox4*  
*Atf6*  
*Hoxb4*  
*Fev*  
*Hoxb8*  
*Hmga2*  
*App*  
*Hoxb3*  
*Hoxa7*  
*Hoxb7*  
*Hoxb6*  
*Hoxb13*  
*Id3*  
*Id1*  
*Gper1*  
*Gata2*  
*Id2*  
*Gtf2f2*  
*Ascl1*  
*Ets1*  
*Clu*  
*Atf6*  
*Ascl1*  
*Hoxa10*  
*Klf2*  
*Lmx1a*  
*Ogt*  
*Dach1*  
*Hoxa9*  
*Fev*  
*Foxj3*

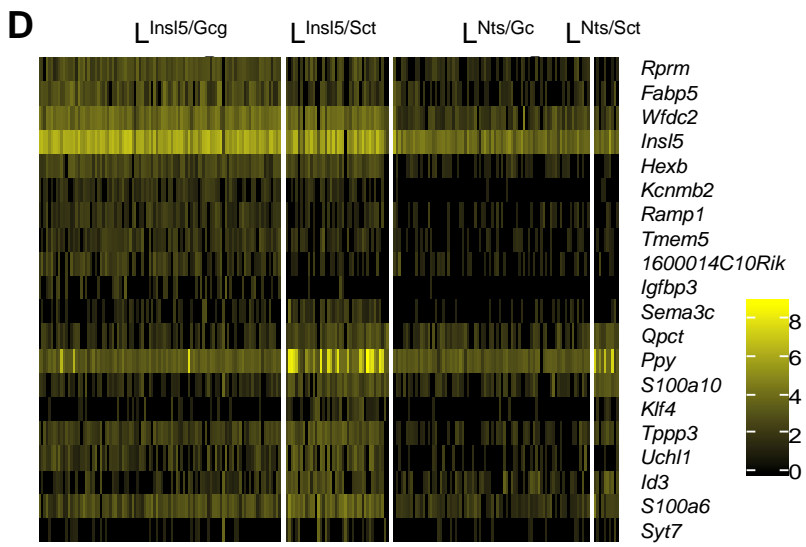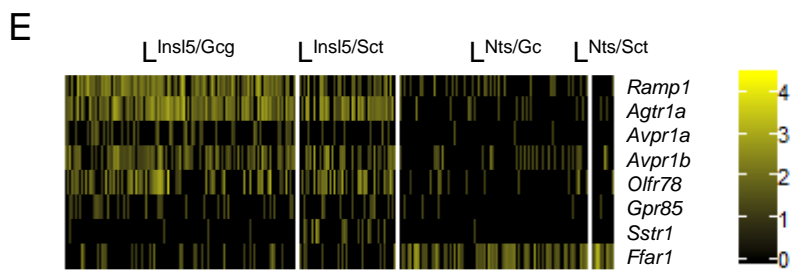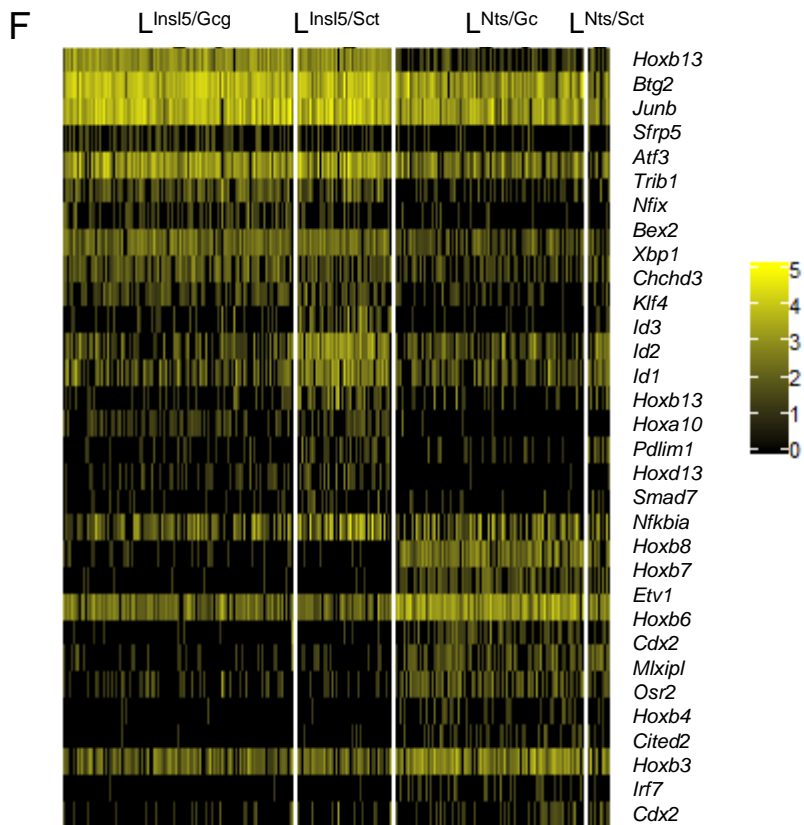

Supplement: mmc1.pdf [file mmc1.pdf]
